# Supplementary material
Source: publisher figshare collection journal article supplement (https://frontiersin.figshare.com/ndownloader/files/28365717)

Supplementary Figure 1: Mean log frequency of critical verbs in their inflected forms

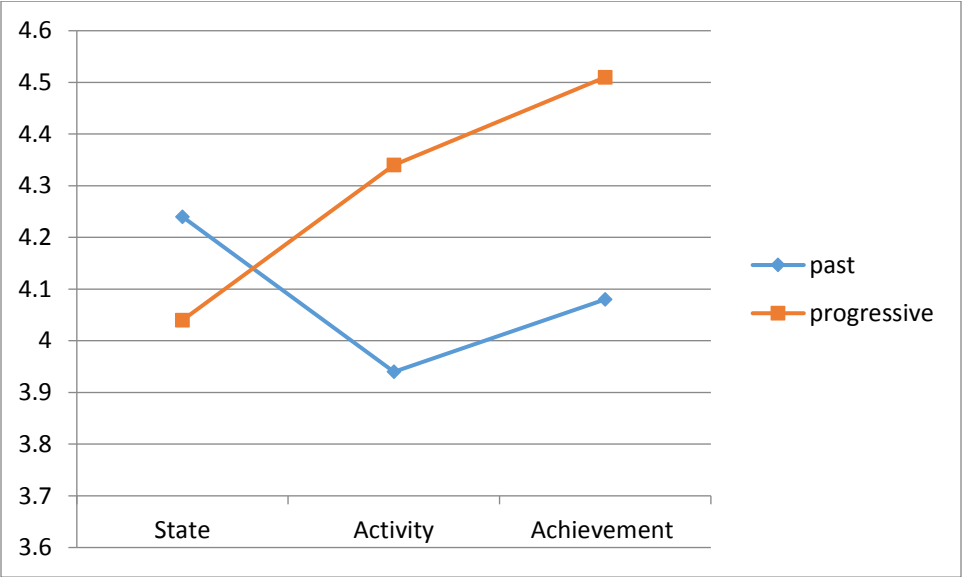

Supplement: Supplementary file [file 28365717]
